# Supplementary material for: Sex-dependent VEGF expression underlies variations in human pluripotent stem cell to endothelial progenitor differentiation
Source: PubMed Central journal article supplement (PMC6853961; doi:10.1038/s41598-019-53054-z), 2019-11-13
Supplement: 41598_2019_53054_MOESM1_ESM.pdf [file 41598_2019_53054_MOESM1_ESM.pdf]

# **Sex-dependent VEGF expression underlies variations in human pluripotent stem cell to endothelial progenitor differentiation**

Lauren N. Randolph<sup>1,2</sup>, Xiaoping Bao<sup>4</sup>, Michael Oddo<sup>1</sup>, Xiaojun Lance Lian<sup>1,2,3,\*</sup>

<sup>1</sup>Department of Biomedical Engineering, Pennsylvania State University, University Park, PA, 16802, USA,

<sup>2</sup>Huck Institutes of the Life Sciences, Pennsylvania State University, University Park, PA, 16802, USA,

<sup>3</sup>Department of Biology, Pennsylvania State University, University Park, PA, 16802, USA,

<sup>4</sup>Davidson School of Chemical Engineering, Purdue University, West Lafayette, IN, 47907, USA

\* Correspondence should be addressed to: Xiaojun Lance Lian ([Lian@psu.edu](mailto:Lian@psu.edu))

**Supplementary Table 1: Antibodies used in immunostaining analysis.**

| <b>Antibody</b>    | <b>Source</b>                                                             | <b>Application</b> |
|--------------------|---------------------------------------------------------------------------|--------------------|
| CD144-FITC         | Miltenyi Biotec, recombinant human IgG1, Clone: REA199, Cat#: 130-100-742 | 1:25 (FC)          |
| VE-cadherin        | Santa Cruz, mouse igG1, Clone: F-8, Cat#: sc-9989                         | 1:1000 (WB)        |
| $\beta$ -actin-HRP | Cell Signaling Technology, rabbit, Clone: 13E5, Cat#: 5125S               | 1:20000 (WB)       |
| Secondary Antibody | Alexa 488 Goat anti Mouse IgG1, Cat#: A-21121                             | 1:1000 (IF)        |
| Secondary Antibody | Anti-mouse IgG HRP-linked, Cell Signaling Technology, Cat#: 7076S         | 1:1000 (WB)        |

**Supplementary Table 2: Primers used in qPCR experiments.**

| <b>Primer</b> | <b>Sequence</b>              | <b>Size (bp) / T<sub>m</sub> (°C) / No. of Cycles</b> |
|---------------|------------------------------|-------------------------------------------------------|
| GAPDH_FWD     | 5'-GTGGACCTGACCTGCCGTCT-3'   | 152 / 55 / 40                                         |
| GAPDH_REV     | 5'-GGAGGAGTGGGTGTCGCTGT-3'   |                                                       |
| VEGF_FWD      | 5'-GGCAAAGTGAGTGACCTGCT-3'   | 106 / 55 / 40                                         |
| VEGF_REV      | 5'-CTGTCTGTCTGTCCGTCAGC-3'   |                                                       |
| SOX2_FWD      | 5'-CAAGATGCACAACCTCGGAGA-3'  | 300 / 55 / 40                                         |
| SOX2_REV      | 5'-GTTTCATGTGCGCGTAACTGT-3'  |                                                       |
| CD34_FWD      | 5'-CCTAAGTGACATCAAGGCAGAA-3' | 201 / 55 / 40                                         |
| CD34_REV      | 5'-GCAAGGAGCAGGGAGCATA-3'    |                                                       |

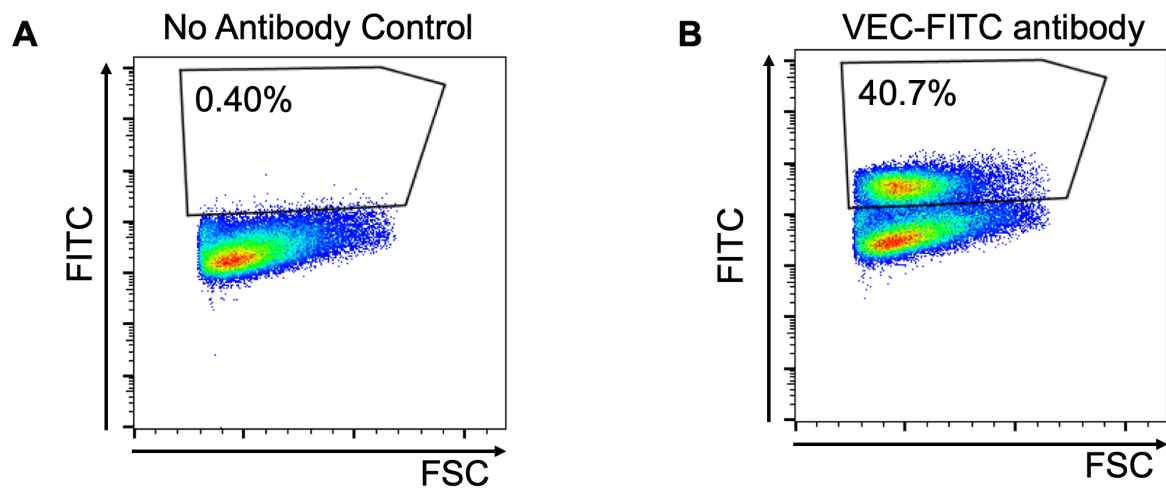

**Figure S1: Flow cytometry analysis for D5 endothelial progenitor cells derived from WT H9 cells.** H9 cells were differentiated using a GSK3 inhibitor based endothelial progenitor differentiation protocol (Gi protocol). On day 5 of differentiation, cells were analyzed for VEC expression by flow cytometry. (A) No antibody control (B) VEC-FITC antibody.

Negative Control

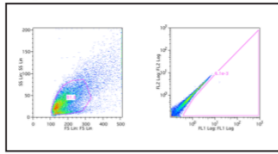

H13 -VEGF

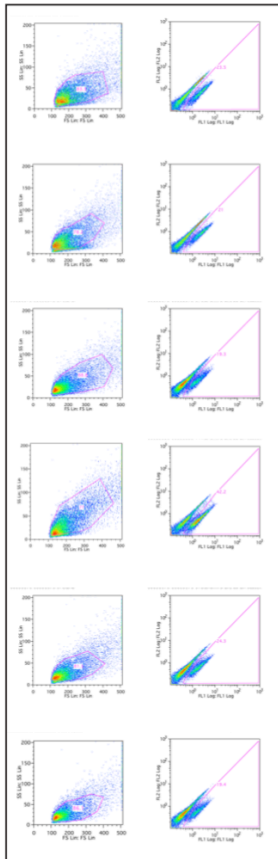

H13 +VEGF

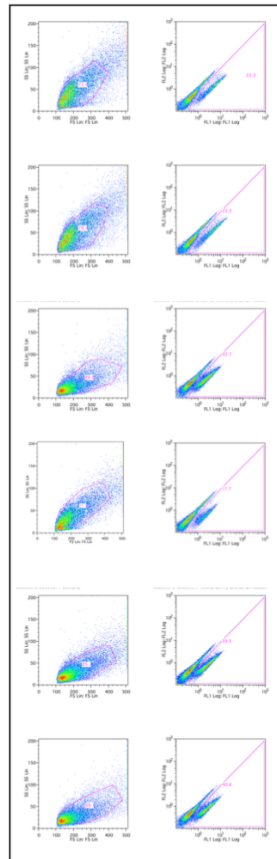

H9 -VEGF

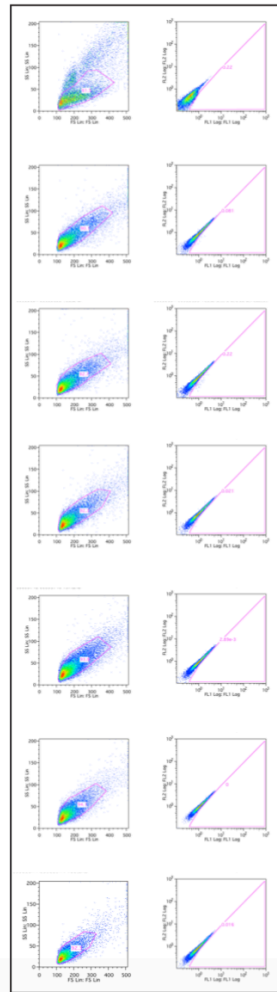

H9 +VEGF

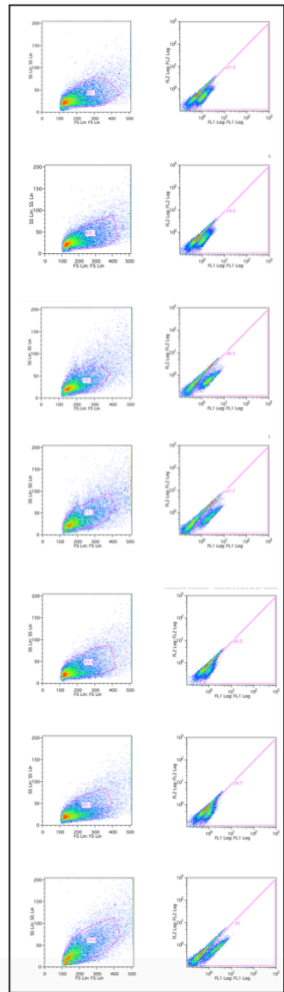

**Figure S2: Gating for all flow plots included in data set.** H9 and H13 VEG-GFP KI cell lines were differentiated using Gi protocol. On day 5 of differentiation, GFP expression was analyzed via flow cytometry.

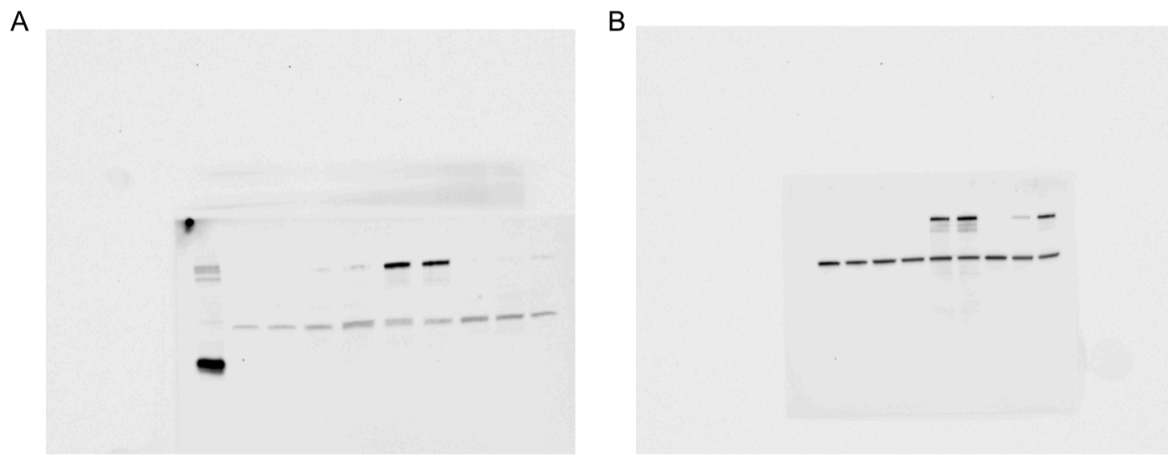

**Figure S3: Full blots for Western blot data.** A) H9 cells B) H13 cells were differentiated with Gi protocol. VEC and beta-actin expression was analyzed via western blot.

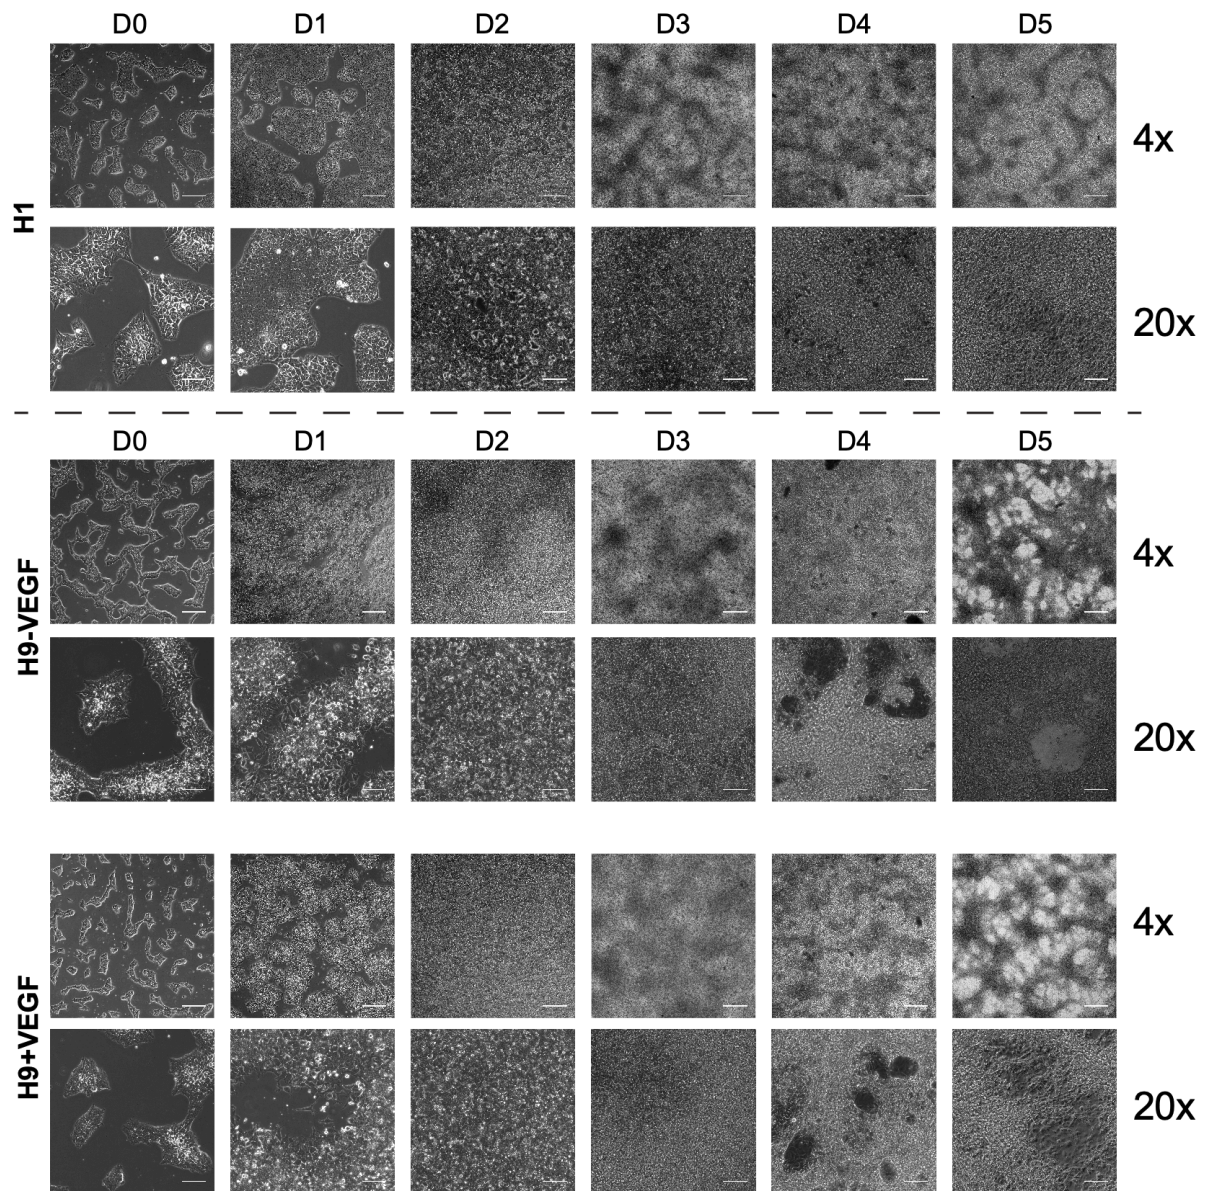

**Figure S4: Representative bright field images of differentiation.** H1 and H9 cells were differentiated with Gi protocol. Bright field images were taken daily during differentiation. Scale bars for 4x images are 500  $\mu\text{m}$ . Scale bars for 20x images are 100  $\mu\text{m}$ .
